# Supplementary material for: Occurrence and Seasonal Variations of Lipophilic Marine Toxins in Commercial Clam Species along the Coast of Jiangsu, China
Source: PubMed Central journal article supplement (PMC4728530; doi:10.3390/toxins8010008), 2015-12-25
Supplement: toxins-08-00008-s001.pdf [file toxins-08-00008-s001.pdf]

# Supplementary Materials: Occurrence and Seasonal Variations of Lipophilic Marine Toxins in Commercial Clam Species along the Coast of Jiangsu, China

Xin-Zhi Wang, Ying Cheng, Na Li, Hong-Mei Wen, Rui Liu, Chen-Xiao Shan, Chuan Chai and Hao Wu

Table S1. Recovery test of the ten investigated LMTs.

| Toxins | <i>M. meretrix</i>  |       | <i>R. philippinarum</i> |       | <i>C. sinensis</i>  |       | <i>M. veneriformis</i> |       |
|--------|---------------------|-------|-------------------------|-------|---------------------|-------|------------------------|-------|
|        | Avg ( <i>n</i> = 5) | RSD % | Avg ( <i>n</i> = 5)     | RSD % | Avg ( <i>n</i> = 5) | RSD % | Avg ( <i>n</i> = 5)    | RSD % |
| GYM    | 81.2                | 6.45  | 80.4                    | 6.88  | 79.7                | 8.44  | 89.5                   | 7.01  |
| SPX1   | 81.0                | 8.19  | 89.9                    | 5.11  | 82.1                | 4.08  | 80.1                   | 3.77  |
| PTX    | 89.4                | 4.29  | 80.3                    | 5.38  | 90.7                | 5.26  | 80.3                   | 6.48  |
| AZA1   | 87.7                | 3.01  | 82.3                    | 7.61  | 90.5                | 2.06  | 80.5                   | 4.07  |
| AZA2   | 80.9                | 3.95  | 81.3                    | 3.79  | 91.6                | 4.2   | 92.8                   | 5.91  |
| AZA3   | 90.2                | 4.22  | 86.5                    | 4.17  | 85.2                | 3.84  | 93.9                   | 8.05  |
| OA     | 94.4                | 2.96  | 100.0                   | 2.41  | 96.1                | 3.65  | 91.7                   | 5.13  |
| DTX1   | 85.1                | 1.93  | 83.9                    | 4.25  | 91.3                | 4.37  | 84.2                   | 3.53  |
| DTX2   | 86.4                | 5.78  | 87.2                    | 4.85  | 83.1                | 6.79  | 81.0                   | 5.09  |
| YTX    | 76.7                | 1.37  | 80.6                    | 5.26  | 81.5                | 5.58  | 78.8                   | 4.17  |

Table S2. Recovery test of OA, DTX1 and DTX2 after alkaline hydrolysis.

| Toxins | <i>M. meretrix</i>  |       | <i>R. philippinarum</i> |       | <i>C. sinensis</i>  |       | <i>M. veneriformis</i> |       |
|--------|---------------------|-------|-------------------------|-------|---------------------|-------|------------------------|-------|
|        | Avg ( <i>n</i> = 5) | RSD % | Avg ( <i>n</i> = 5)     | RSD % | Avg ( <i>n</i> = 5) | RSD % | Avg ( <i>n</i> = 5)    | RSD % |
| OA     | 83.2                | 9.95  | 89.3                    | 8.32  | 90.6                | 6.62  | 81.9                   | 7.46  |
| DTX1   | 75.2                | 6.12  | 84.3                    | 7.51  | 78.0                | 5.37  | 72.3                   | 6.13  |
| DTX2   | 79.3                | 7.81  | 79.3                    | 6.13  | 71.9                | 8.13  | 78.7                   | 10.95 |

Table S3. Precision test of the ten investigated LMTs <sup>a</sup>.

| Compounds | Spiked Levels<br>( $\mu\text{g}/\text{kg}$ ) | Intra-Day Precision ( <i>n</i> = 6)             |       | Inter-Day Precision ( <i>n</i> = 5) |
|-----------|----------------------------------------------|-------------------------------------------------|-------|-------------------------------------|
|           |                                              | Mean Value ( $\mu\text{g}/\text{kg}$ ) $\pm$ SD | RSD % | RSD %                               |
| GYM       | 0.1                                          | 0.08 $\pm$ 0.00                                 | 0.89  | 1.29                                |
|           | 1.04                                         | 0.89 $\pm$ 0.02                                 | 1.9   | 2.04                                |
|           | 10.43                                        | 8.67 $\pm$ 0.27                                 | 3.16  | 3.14                                |
| SPX1      | 0.24                                         | 0.22 $\pm$ 0.01                                 | 2.91  | 3.04                                |
|           | 2.35                                         | 1.98 $\pm$ 0.07                                 | 3.3   | 3.35                                |
|           | 23.5                                         | 20.36 $\pm$ 0.77                                | 3.77  | 4.89                                |
| PTX       | 0.15                                         | 0.14 $\pm$ 0.01                                 | 2.92  | 2.35                                |
|           | 1.47                                         | 1.28 $\pm$ 0.05                                 | 3.63  | 3.99                                |
|           | 14.69                                        | 13.12 $\pm$ 0.66                                | 5.01  | 5.65                                |
| AZA1      | 0.1                                          | 0.09 $\pm$ 0.00                                 | 2.94  | 3.06                                |
|           | 1.03                                         | 0.98 $\pm$ 0.02                                 | 2.5   | 2.09                                |
|           | 10.33                                        | 9.03 $\pm$ 0.33                                 | 3.65  | 4.95                                |
| AZA2      | 0.13                                         | 0.11 $\pm$ 0.00                                 | 1.41  | 2.65                                |
|           | 1.27                                         | 1.12 $\pm$ 0.02                                 | 1.87  | 3.94                                |
|           | 12.7                                         | 11.36 $\pm$ 0.28                                | 2.5   | 4.52                                |

Table S3. Cont.

| Compounds | Spiked Levels<br>( $\mu\text{g}/\text{kg}$ ) | Intra-Day Precision ( $n = 6$ )                 |       | Inter-Day Precision ( $n = 5$ ) |
|-----------|----------------------------------------------|-------------------------------------------------|-------|---------------------------------|
|           |                                              | Mean Value ( $\mu\text{g}/\text{kg}$ ) $\pm$ SD | RSD % | RSD %                           |
| AZA3      | 0.13                                         | 0.12 $\pm$ 0.00                                 | 2.72  | 2.11                            |
|           | 1.3                                          | 1.19 $\pm$ 0.01                                 | 1.14  | 2.39                            |
|           | 13                                           | 12.01 $\pm$ 0.5                                 | 4.18  | 3.97                            |
| OA        | 0.1                                          | 0.09 $\pm$ 0.00                                 | 4.47  | 4.01                            |
|           | 0.98                                         | 0.98 $\pm$ 0.04                                 | 4.04  | 5.11                            |
|           | 10.42                                        | 10.12 $\pm$ 0.51                                | 5.06  | 5.53                            |
| DTX1      | 0.15                                         | 0.14 $\pm$ 0.00                                 | 1.01  | 2.92                            |
|           | 1.52                                         | 1.39 $\pm$ 0.02                                 | 1.71  | 3.26                            |
|           | 15.15                                        | 14.06 $\pm$ 0.38                                | 2.7   | 4.09                            |
| DTX2      | 0.16                                         | 0.15 $\pm$ 0.00                                 | 1.65  | 1.97                            |
|           | 1.56                                         | 1.46 $\pm$ 0.02                                 | 1.09  | 2.35                            |
|           | 15.62                                        | 13.05 $\pm$ 0.35                                | 2.71  | 3.21                            |
| YTX       | 0.14                                         | 0.12 $\pm$ 0.01                                 | 4.58  | 5.07                            |
|           | 1.4                                          | 1.23 $\pm$ 0.03                                 | 2.79  | 2.59                            |
|           | 14                                           | 12.94 $\pm$ 0.47                                | 3.67  | 4.01                            |

<sup>a</sup> Precision test was conducted in *R. philippinarum* matrices.

Table S4. Precision test of OA, DTX1 and DTX2 after alkaline hydrolysis <sup>a</sup>.

| Compounds | Spiked Levels<br>( $\mu\text{g}/\text{kg}$ ) | Intra-Day Precision ( $n = 6$ )                 |       | Inter-Day Precision ( $n = 5$ ) |
|-----------|----------------------------------------------|-------------------------------------------------|-------|---------------------------------|
|           |                                              | Mean Value ( $\mu\text{g}/\text{kg}$ ) $\pm$ SD | RSD % | RSD %                           |
| OA        | 0.10                                         | 0.09 $\pm$ 0.00                                 | 6.01  | 6.19                            |
|           | 1.96                                         | 1.61 $\pm$ 0.11                                 | 6.55  | 6.02                            |
|           | 19.60                                        | 16.57 $\pm$ 0.83                                | 5.03  | 5.31                            |
| DTX1      | 0.15                                         | 0.14 $\pm$ 0.00                                 | 3.99  | 3.81                            |
|           | 3.03                                         | 2.60 $\pm$ 0.14                                 | 5.38  | 6.10                            |
|           | 30.31                                        | 25.87 $\pm$ 1.41                                | 5.45  | 5.37                            |
| DTX2      | 0.16                                         | 0.15 $\pm$ 0.00                                 | 2.31  | 3.84                            |
|           | 3.12                                         | 2.82 $\pm$ 0.16                                 | 5.65  | 5.93                            |
|           | 31.24                                        | 28.38 $\pm$ 1.06                                | 3.74  | 4.15                            |

<sup>a</sup> Precision test was conducted in hydrolysed *R. philippinarum* matrices.

Table S5. Current permitted levels in EU legislation and levels proposed by EFSA <sup>a</sup>.

| Toxin       | EU Legislation ( $\mu\text{g}/\text{kg}$ ) | EFSA Opinion ( $\mu\text{g}/\text{kg}$ ) |
|-------------|--------------------------------------------|------------------------------------------|
| OA and DTXs | 160 <sup>b</sup>                           | 45                                       |
| PTXs        | -                                          | 120                                      |
| YTXs        | 1000                                       | 3750                                     |
| AZAs        | 160                                        | 32                                       |

<sup>a</sup> The European Food Safety Authority; <sup>b</sup> including PTXs.

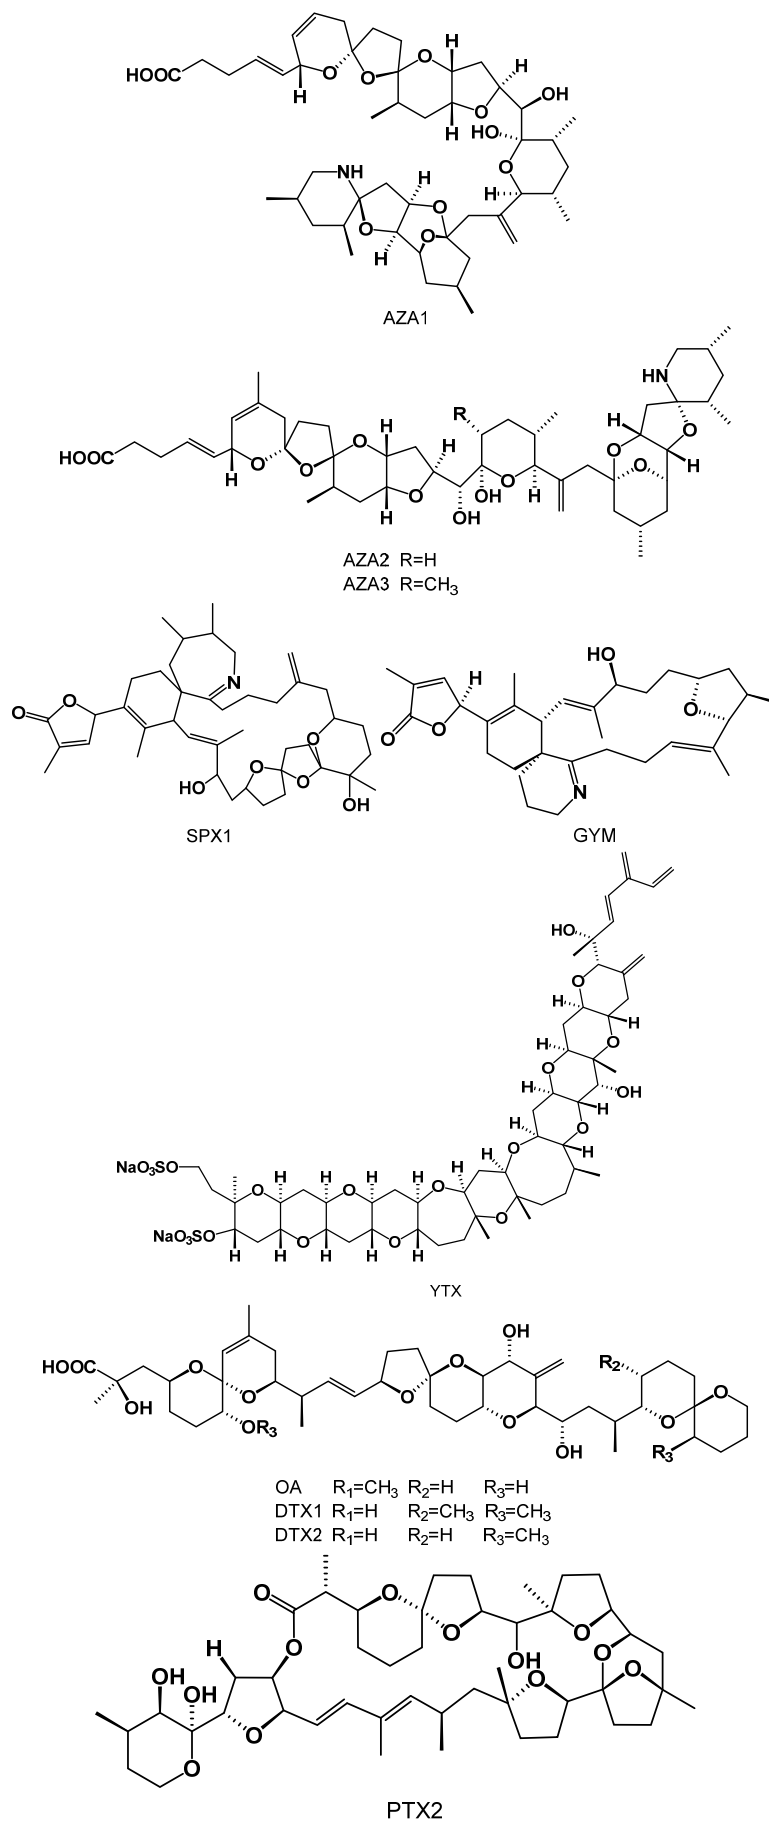

Figure S1. Chemical structures of ten lipophilic marine toxins.

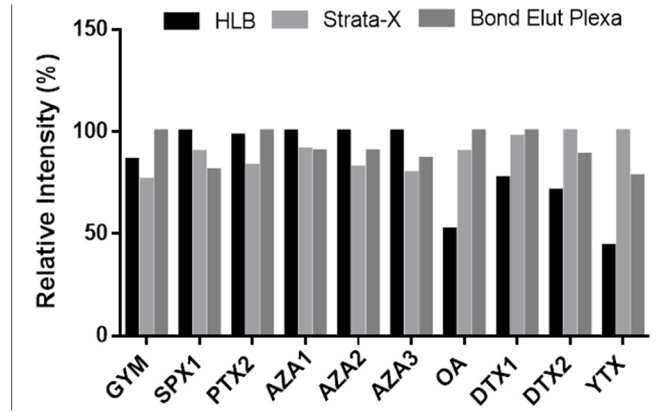

**Figure S2.** Relative intensity of LMTs on three different polymetric sorbents with the preliminary SPE protocol. Highest intensity per individual toxin is set at 100%. Wash with 25% (*v/v*) methanol and elution with methanol.

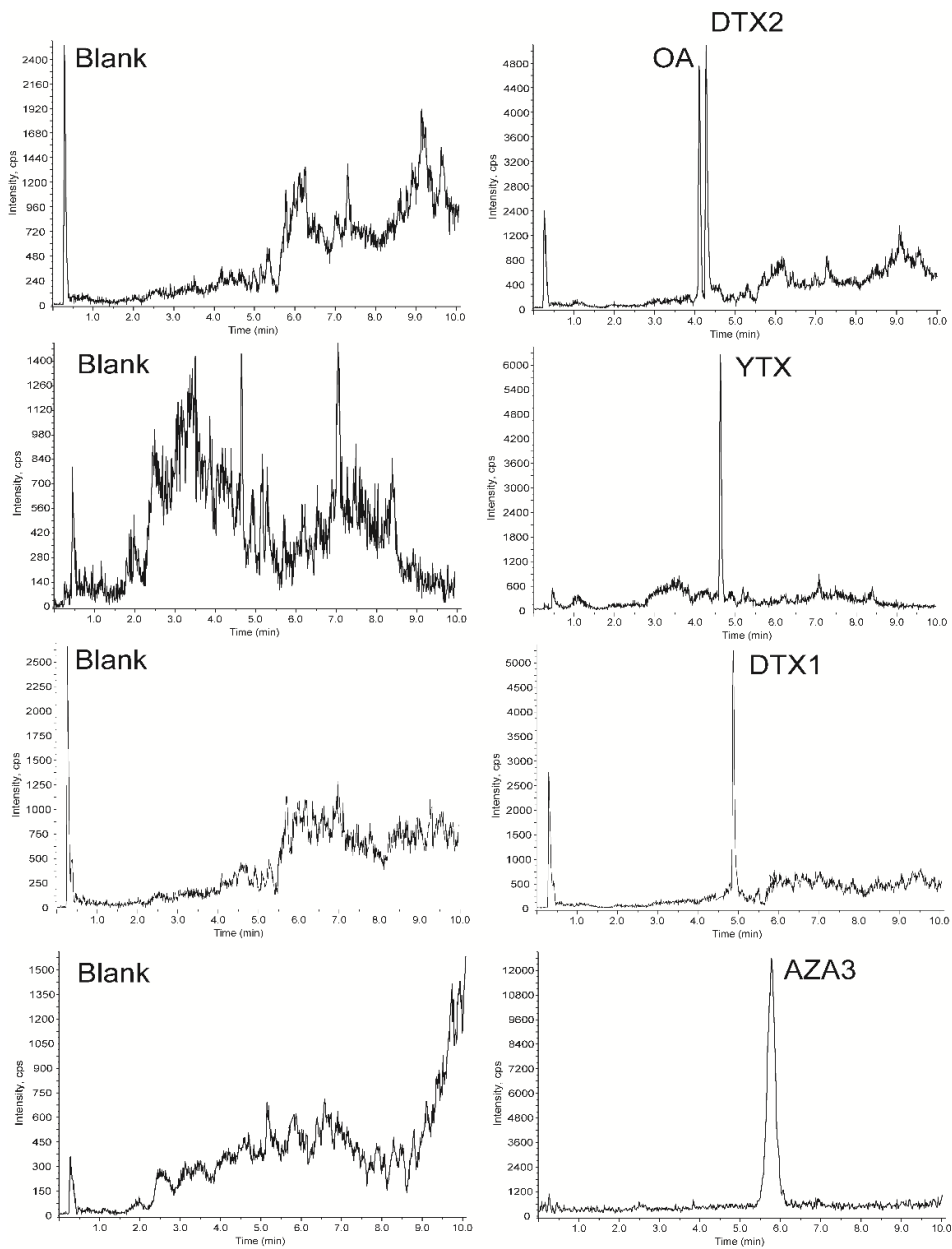

**Figure S3. Cont.**

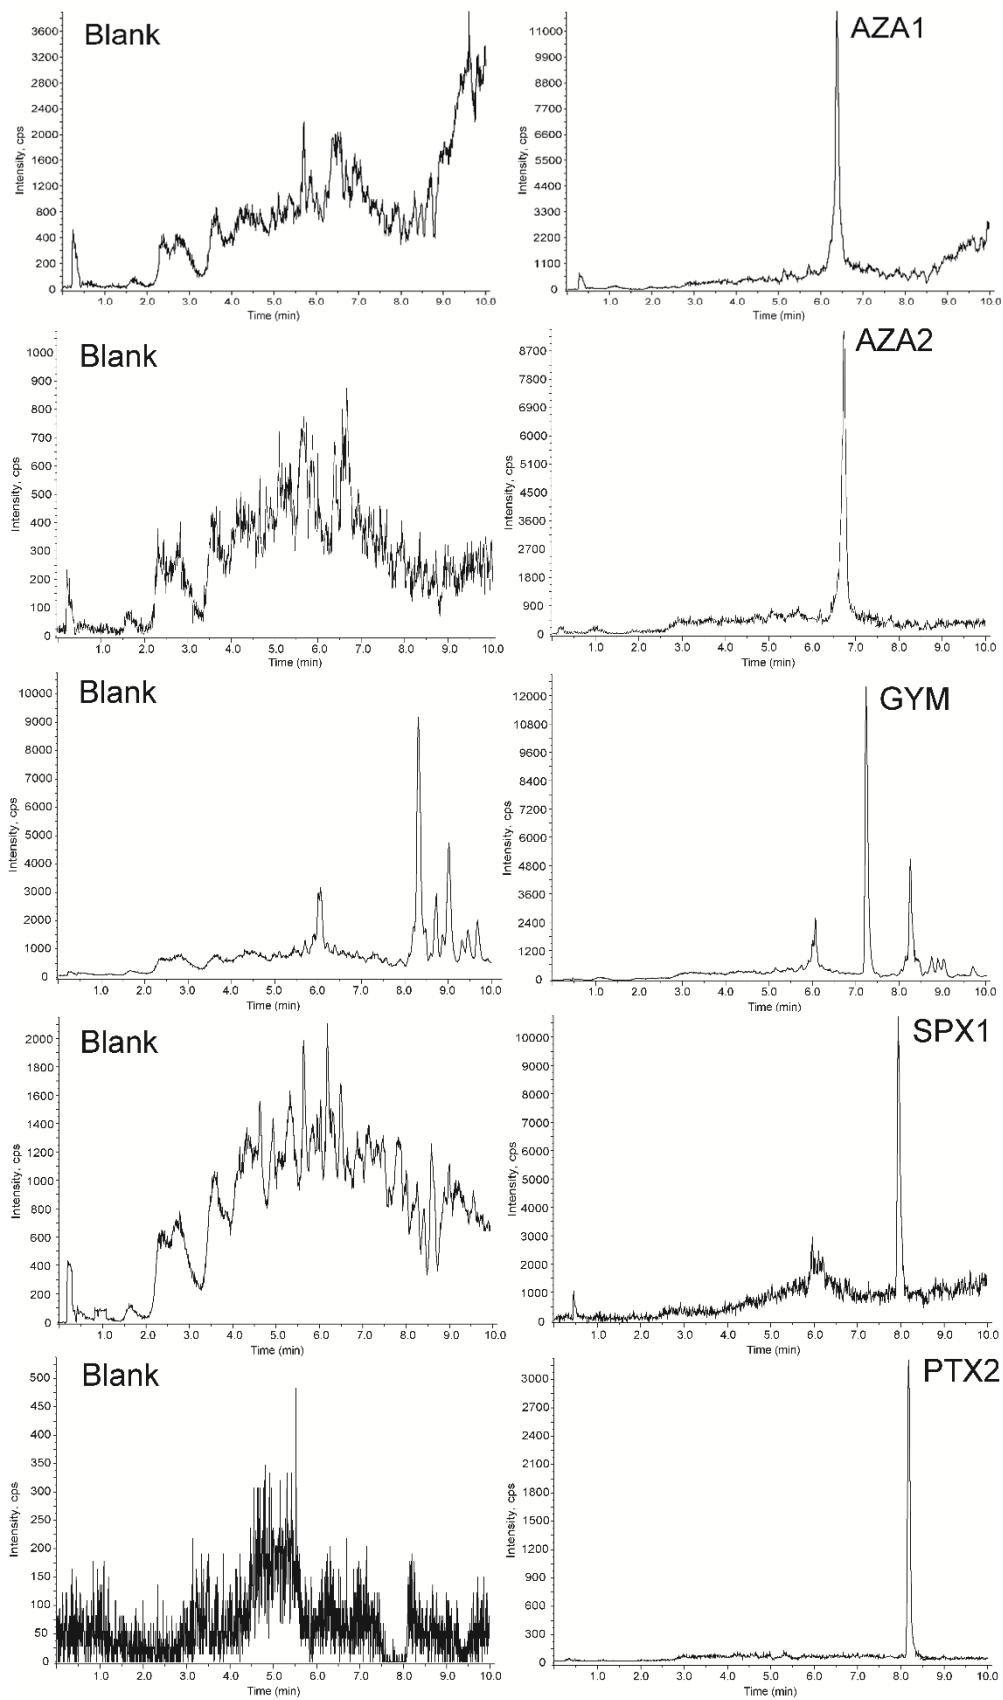

**Figure S3.** UFLC-TQ-MS/MS MRM chromatograms of the blank *M. meretrix* matrix and spiked samples. UFLC-TQ-MS/MS MRM chromatograms of the blank *M. meretrix* matrix and spiked samples. The chromatograms of blank samples are magnified to ensure there was no target compound peak exist.

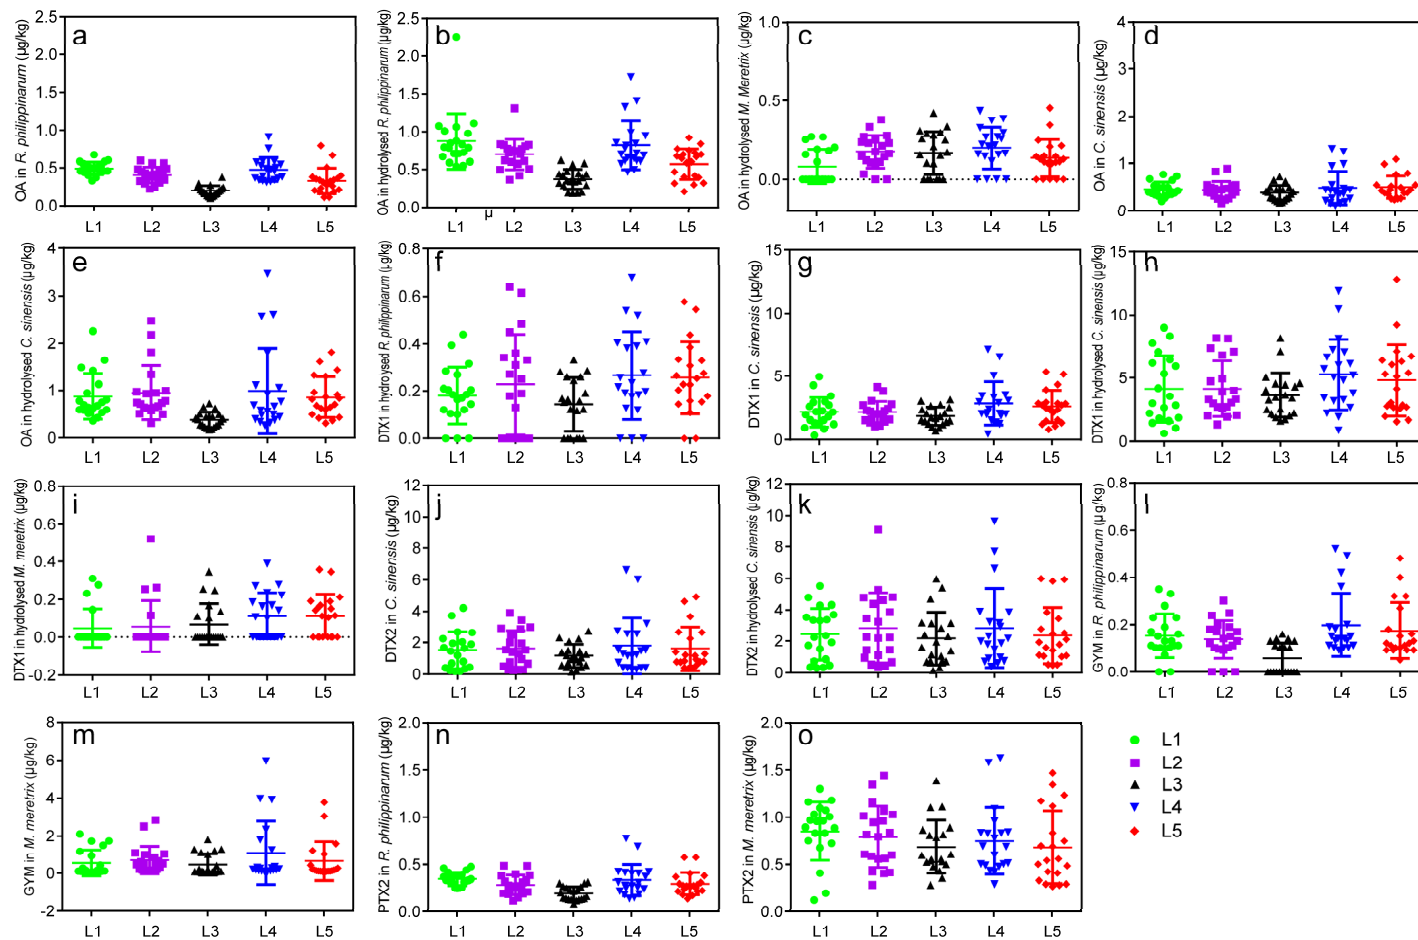

**Figure S4.** Distribution of LMTs in clam samples from different sampling locations in Jiangsu, China, during January 2014 to August 2015. (a)~(e) OA content in *R. philippinarum*, *M. meretrix*, *C. sinensis* and their hydrolysed samples, (f)~(i) DTX1 content in hydrolysed *R. philippinarum*, *C. sinensis*, hydrolysed *C. sinensis* and *M. meretrix* samples, (j,k) DTX2 content in *C. sinensis* and its hydrolysed samples, (l,m) GYM content in *R. philippinarum* and *M. meretrix* samples, (n)~(o) PTX2 content in *R. philippinarum* and *M. meretrix* samples; L1: Maojia harbor, L2: Lvsj harbor, L3: Dafeng harbor, L4: Ganyu, and L5: Lianyung harbor. Each dot represents one month across the sampling period grouped by sample location and content scales are different for each graph.
